# Supplementary material
Source: PubMed Central journal article supplement (PMC3569099)
Supplement: NIHMS398137-supplement-1_si_001.pdf [file NIHMS398137-supplement-1_si_001.pdf]

Supporting Information For

The Effect of the Disease-Causing R266K Mutation on the Heme and  
PLP Environments of Human Cystathionine  $\beta$ -Synthase

Aaron T. Smith,<sup>1</sup> Yang Su,<sup>1</sup> Daniel J. Stevens,<sup>1</sup> Tomas Majtan,<sup>2,3</sup> Jan P. Kraus,<sup>2</sup> Judith N.  
Burstyn<sup>1\*</sup>

<sup>1</sup>Department of Chemistry, University of Wisconsin-Madison, 1101 University Ave., Madison,  
Wisconsin, 53706 USA

<sup>2</sup>Department of Pediatrics, University of Colorado, Denver, Aurora, Colorado 80045

<sup>3</sup>Department of Genomics & Biotechnology, Institute of Molecular Biology SAS, Dubravska  
cesta 21, Bratislava, 84551, Slovakia

- a) Fe(III) WT hCBS pH 8.6  
b) Fe(III) R266K hCBS pH 8.6

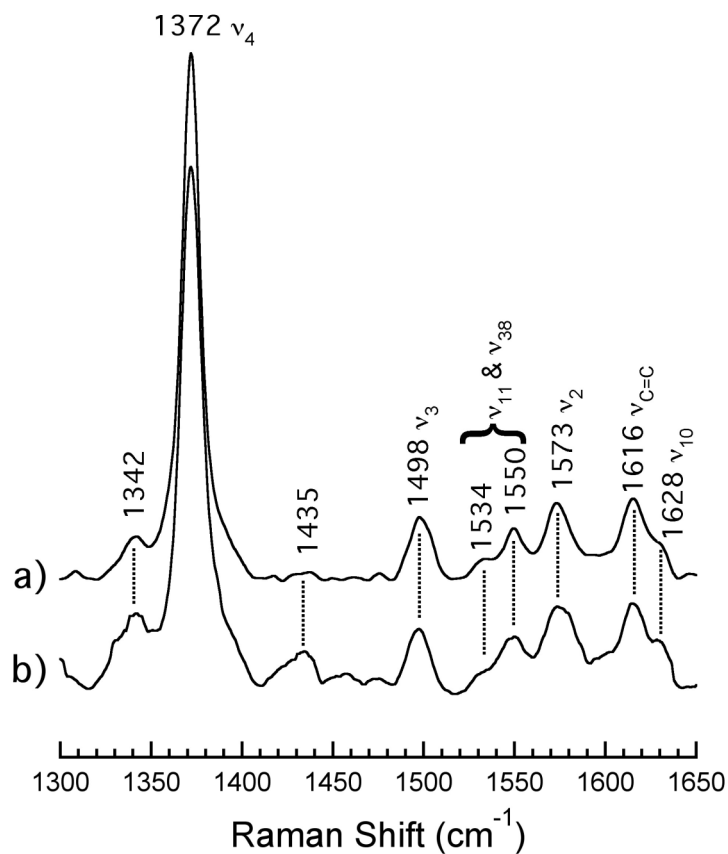

**Figure S1.** Resonance Raman spectra of Fe(III) A) WT hCBS and B) R266K hCBS. Proteins (141  $\mu\text{M}$  and 235  $\mu\text{M}$ , A and B, respectively) were in 100 mM CHES buffer and 100 mM NaCl, pH 8.6. Spectra were acquired using solution samples by excitation with a 413.1 nm line provided by a  $\text{Kr}^+$  laser with 10.5 mW of power at the sample. All measurements were carried out with the sample immersed in a bath of ice water to reduce local heating. Peak positions were calibrated against a  $\text{K}_2\text{SO}_4$  standard.

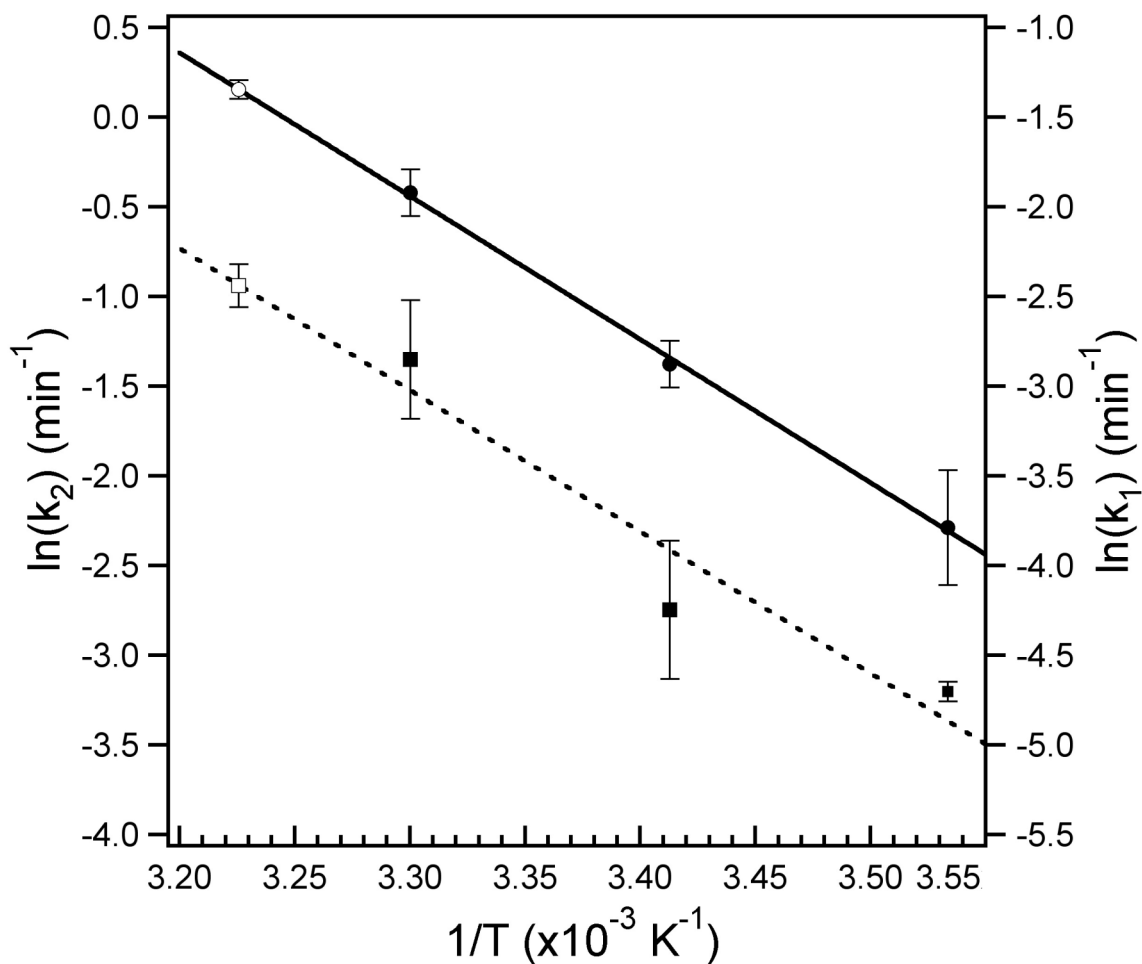

**Figure S2.** Arrhenius plots of the fit rate constants ( $\text{min}^{-1}$ ) for the loss of the Cys(thiolate)-ligated heme Soret of Fe(II) R266K hCBS. Experimental values of  $k_1$  (solid circles, ●) and  $k_2$  (solid squares, ■) were determined for 10, 20 and 30°C (283, 293, and 303 K, respectively). Extrapolated values for  $k_1$  (open circle, ○) and  $k_2$  (open square, □) were determined at 37°C (310 K). Error bars represent  $\pm$  one standard deviation of the fit value determined from three replicate measurements.
